# Supplementary material
Source: PubMed Central journal article supplement (PMC5078990)
Supplement: NIHMS819824-supplement-Supplemental_material.pdf [file NIHMS819824-supplement-Supplemental_material.pdf]

## Supplementary Online Content

Arora M, Sun CL, Ness KK, et al . Physiologic frailty in nonelderly hematopoietic cell transplantation patients: Results From the Bone Marrow Transplant Survivor Study. Published online June 2, 2016. *JAMA Oncol*. doi:10.1001/jamaoncol.2016.0855.

### **eTable.** Frailty phenotype

This supplementary material has been provided by the authors to give readers additional information about their work.

eTable. Frailty Phenotype

| Indices                       | BMTSS Questionnaire                                                                                                                                             | Code                                                           | Fried's criteria <sup>1</sup>                                                                                                                                                             | Code                                                                                                                                                                                         |
|-------------------------------|-----------------------------------------------------------------------------------------------------------------------------------------------------------------|----------------------------------------------------------------|-------------------------------------------------------------------------------------------------------------------------------------------------------------------------------------------|----------------------------------------------------------------------------------------------------------------------------------------------------------------------------------------------|
| <b>Clinically underweight</b> | BMI calculated from self-reported weight and height                                                                                                             | <18.5=1;                                                       | Unintentional weight loss in prior year                                                                                                                                                   | ≥10 pounds or loss of ≥ 5% of body weight= 1                                                                                                                                                 |
| <b>Exhaustion</b>             | BSI 18: "Feeling weak in parts of your body"                                                                                                                    | Not at all, a little bit=0; Moderate, quite a bit, extremely=1 | CES-D scale: Two questions: a) I felt that everything I did was an effort; (b) I could not get going. "How often in the last week did you feel this way?"                                 | 0=rarely or none of the time (<1 day), 1=some or a little of the time (1-2 days) 2=moderate amount of the time (3-4 days) OR 3=most of the time.<br><b>Subjects answering "2" or "3" = 1</b> |
| <b>Low Energy Expenditure</b> | "On how many of the past 7 days did you exercise or do sports at least 20 minutes that made you sweat or breathe hard (e.g. dancing, jogging, basketball etc.)" | <2 days=1; ≥2 days=0                                           | Based on the short version of the Minnesota Leisure Time Activity questionnaire, asking about activities and sports. Kcals per week expended are calculated using standardized algorithm. | Men: Kcals of physical activity per week < 383 = 1<br>Women: Kcals per week < 270 = 1                                                                                                        |
| <b>Slowness</b>               | "Over the last 2 years, how long (if at all) has your health limited you in: i) walking uphill or climbing a few flights of stairs; ii) walking one block       | Either item limited over three months=1; Else=0;               | Time to walk 15 feet                                                                                                                                                                      | Men :<br>Height: ≤173 cm: ≥7 seconds=1;<br>Height >173 cm: ≥6 seconds:1<br>Women<br>Height: ≤159 cm: ≥7 seconds=1;<br>Height >159: cm ≥6 seconds=1                                           |
| <b>Weakness</b>               | Weakness or inability to move arm(s)                                                                                                                            | Yes=1; No=0                                                    | Grip strength                                                                                                                                                                             | Cutoff for grip strength (Kg)                                                                                                                                                                |

|  |  |                                                                                        |  |                                                                                                                                                                                                                                                                                           |
|--|--|----------------------------------------------------------------------------------------|--|-------------------------------------------------------------------------------------------------------------------------------------------------------------------------------------------------------------------------------------------------------------------------------------------|
|  |  |                                                                                        |  | Men<br>BMI $\leq 24$ : $\leq 29$ ; BMI = 24.1-26: $\leq 30$ ;<br>BMI=26.1-28: $\leq 30$ ; BMI >28: $\leq 32$ ;<br><br>Women<br>BMI $\leq 23$ : $\leq 17$ ; BMI=23.1-26: $\leq 17.3$ ;<br>BMI=26.1-29: $\leq 18$ ; BMI >29: $\leq 21$<br><b>Grip strength <math>\leq</math> cutoff = 1</b> |
|  |  |                                                                                        |  |                                                                                                                                                                                                                                                                                           |
|  |  | <b>Score <math>\geq 3</math>: Frail</b><br><b>Score <math>\leq 2</math>: not frail</b> |  |                                                                                                                                                                                                                                                                                           |

Abbreviations: BSI: brief symptom inventory, CES-D: Center for Epidemiological Studies-depression
